# Supplementary material for: Unique physical–chemical, apatite-forming properties and human marrow mesenchymal stem cells (HMSCs) response of sol–gel bioactive glass microspheres
Source: Royal Society of Chemistry journal article supplement (doi:10.1039/c1jm11547b), 2011-01-01
Supplement: c1jm11547b1.pdf [file c1jm11547b1.pdf]

## Additions and corrections

---

### Unique physical–chemical, apatite–forming properties and human marrow mesenchymal stem cells (HMSCs) response of sol–gel bioactive glass microspheres

Bo Lei\*, Xiaofeng Chen, Xue Han and Zhengmao Li

*J. Mater. Chem.*, 2011, **21**, 12725–12734 (DOI: 10.1039/C1JM11547B). *Amendment published 26 October 2021.*

---

The authors regret a mistake in the fluorescence images of **Figure 11**. in this article. The fluorescent images for **Figure 11c** and **Figure 11d** were reproduced incorrectly. The corrected figure is shown below. The authors confirm that this mistake has no effect on the conclusions of this article.

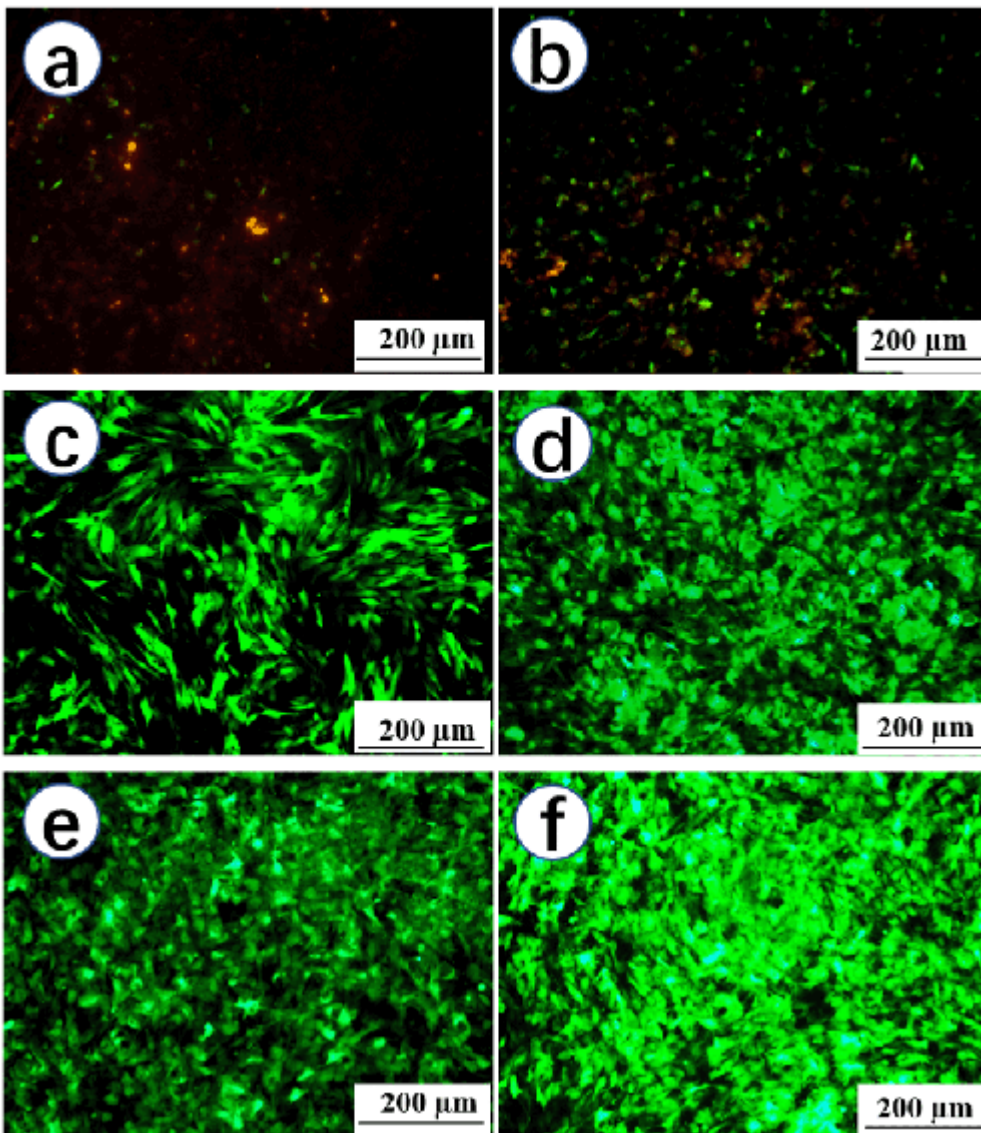

**Figure 11** FM images of HMSCs cultured on IBG for 4 h (a), 1 d (c) and 7 d (e), and BGM for 4 h (b), 1 d (d) and 7 d (f).

---

The Royal Society of Chemistry apologises for these errors and any consequent inconvenience to authors and readers.

---
